# Supplementary material for: Preparation of TiO2 aerogels by a sol-gel combined solvothermal route
Source: Royal Society of Chemistry journal article supplement (doi:10.1039/b819849g), 2009-01-01

### Supporting Information

**Figure S1.** Photographs of wet-gels before (a) and after solvothermal treatments at 120 °C (b), 140 °C (c) and 160 °C (d).

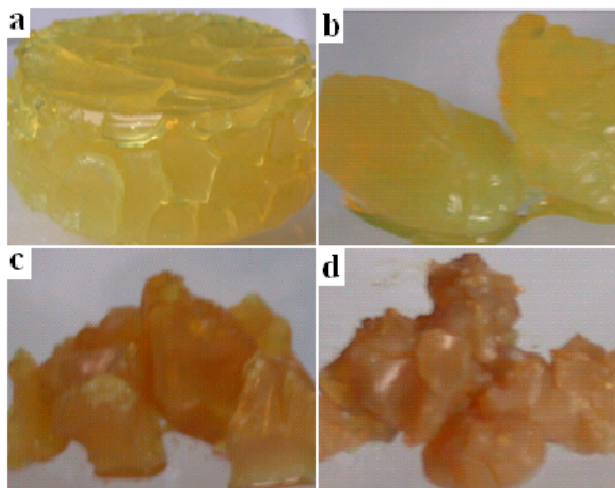

**Figure S2.** HR-TEM images of the samples after solvothermal treating at 120 °C (a), 140 °C (b), and 160 °C (c).

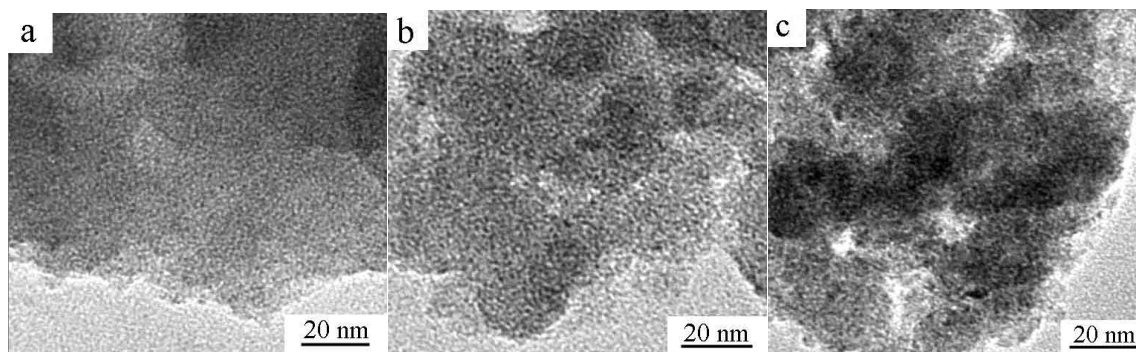

**Figure S3.** HR-TEM images of the aerogel obtained from the gel without solvothermal treatment. Nanopores can be seen clearly from the images, but no lattice fringes of the crystalline  $\text{TiO}_2$  can be examined, indicating the amorphous nature of the aerogel.

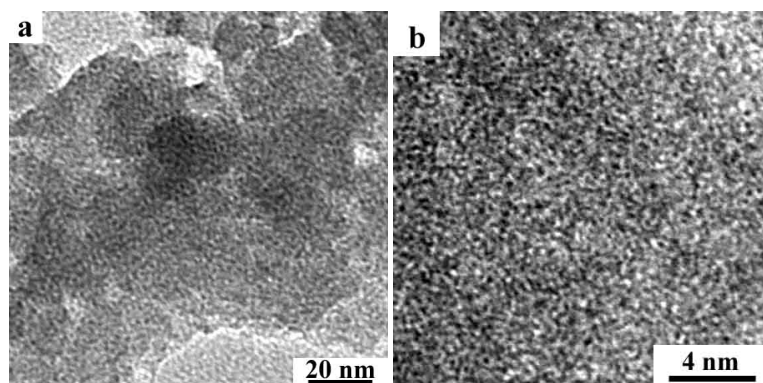

**Figure S4.** HR-TEM images of calcined aerogel-120 (a)/-140 (b)/-160 (c).

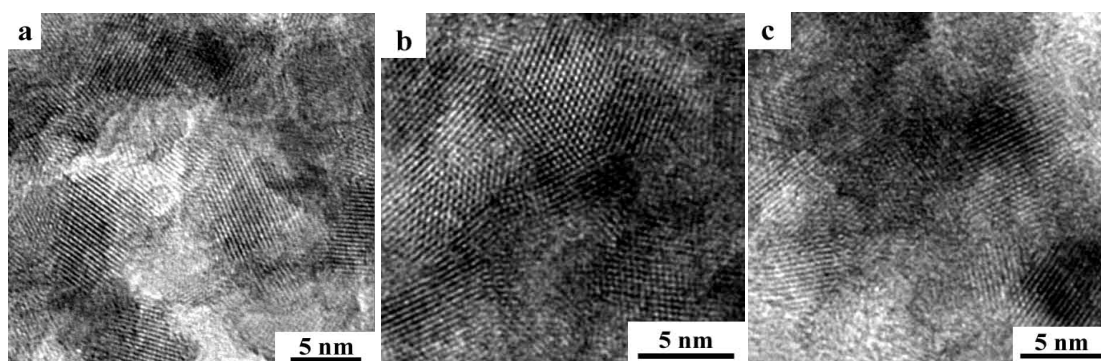

**Figure S5.** IR spectra of calcined aerogels from the wet-gels solvothermally treated at 120 °C (a), 140 °C (b) and 160 °C (c).

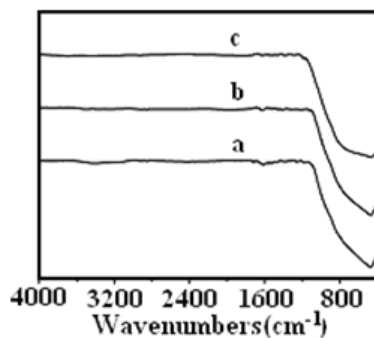

**Figure S6.** XRD patterns of the as-obtained (A) and calcined (B) aerogels. (a) aerogel-120, (b) aerogel-140, (c) aerogel-160.

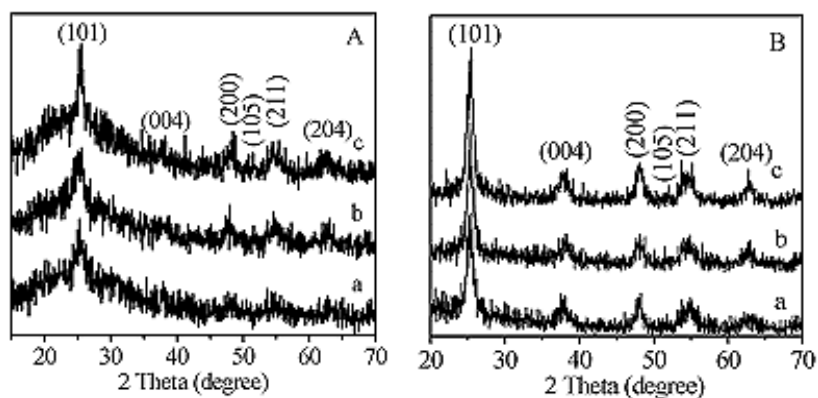

Supplement: b819849g.pdf [file b819849g.pdf]
